# Supplementary material for: Photosynthesis, Phytohormone Signaling and Sugar Catabolism in the Culm Sheaths of Phyllostachys edulis
Source: MDPI journal article supplement (doi:10.3390/plants11212866), 2022-10-27

**Figure S3.** Acidic fuchsin staining tracer for vascular bundles. (A) Lateral observation. (B) Section observation. The red arrow indicates vascular bundles connecting the bamboo sheath to the bamboo shoot.

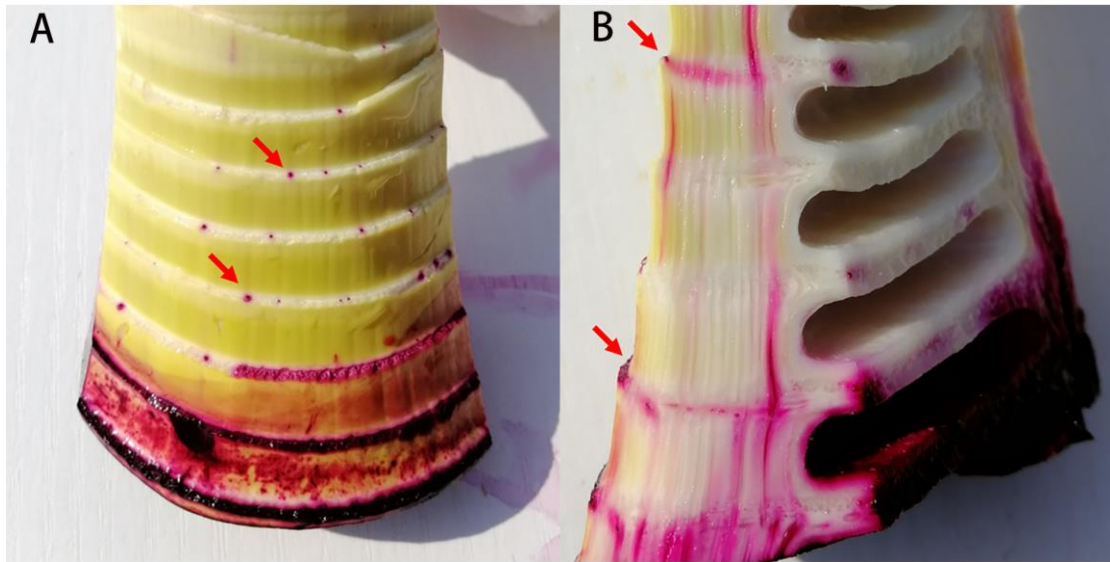

Supplement: s1 [file s1]
