# Supplementary material for: Photosynthesis, Phytohormone Signaling and Sugar Catabolism in the Culm Sheaths of Phyllostachys edulis
Source: MDPI journal article supplement (doi:10.3390/plants11212866), 2022-10-27

**Figure S1.** Diurnal variation of gas exchange parameters in bamboo shoot sheath blades.

(A) Pn: net photosynthetic rate. (B) CO<sub>2int</sub>: intercellular CO<sub>2</sub> concentration. (C) E: transpiration rate. (D) gs: stomatal conductance. (E) WUE: water-use efficiency. The experiments were repeated three times.  $P < 0.05$ .

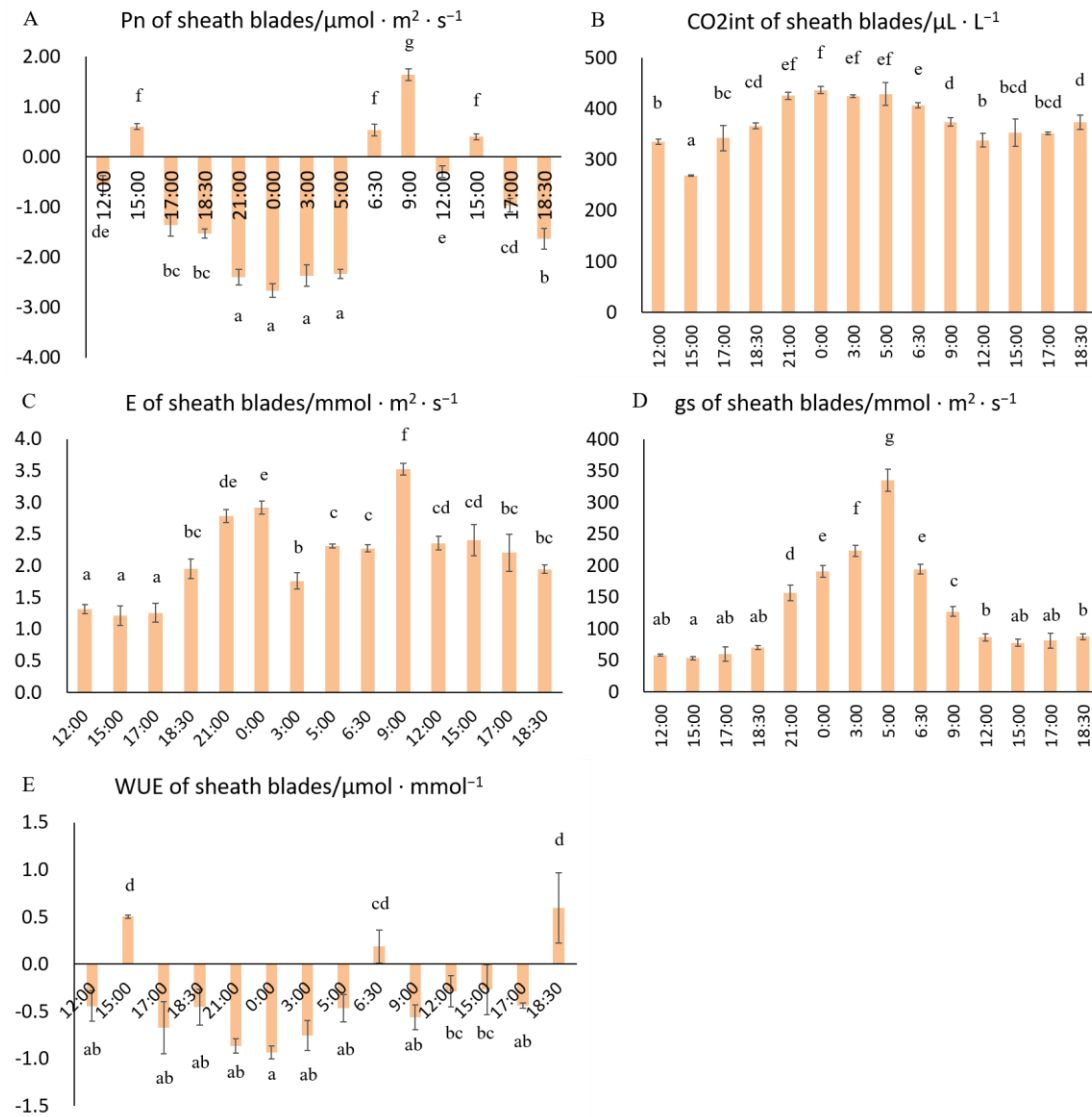

Supplement: s1 [file s1]
