# Supplementary material for: Photosynthesis, Phytohormone Signaling and Sugar Catabolism in the Culm Sheaths of Phyllostachys edulis
Source: MDPI journal article supplement (doi:10.3390/plants11212866), 2022-10-27

**Figure S5.** KEGG enrichment and classification analysis of differentially expressed genes. A KEGG enrichment analysis of differentially expressed genes; B KEGG class analysis of differentially expressed genes.

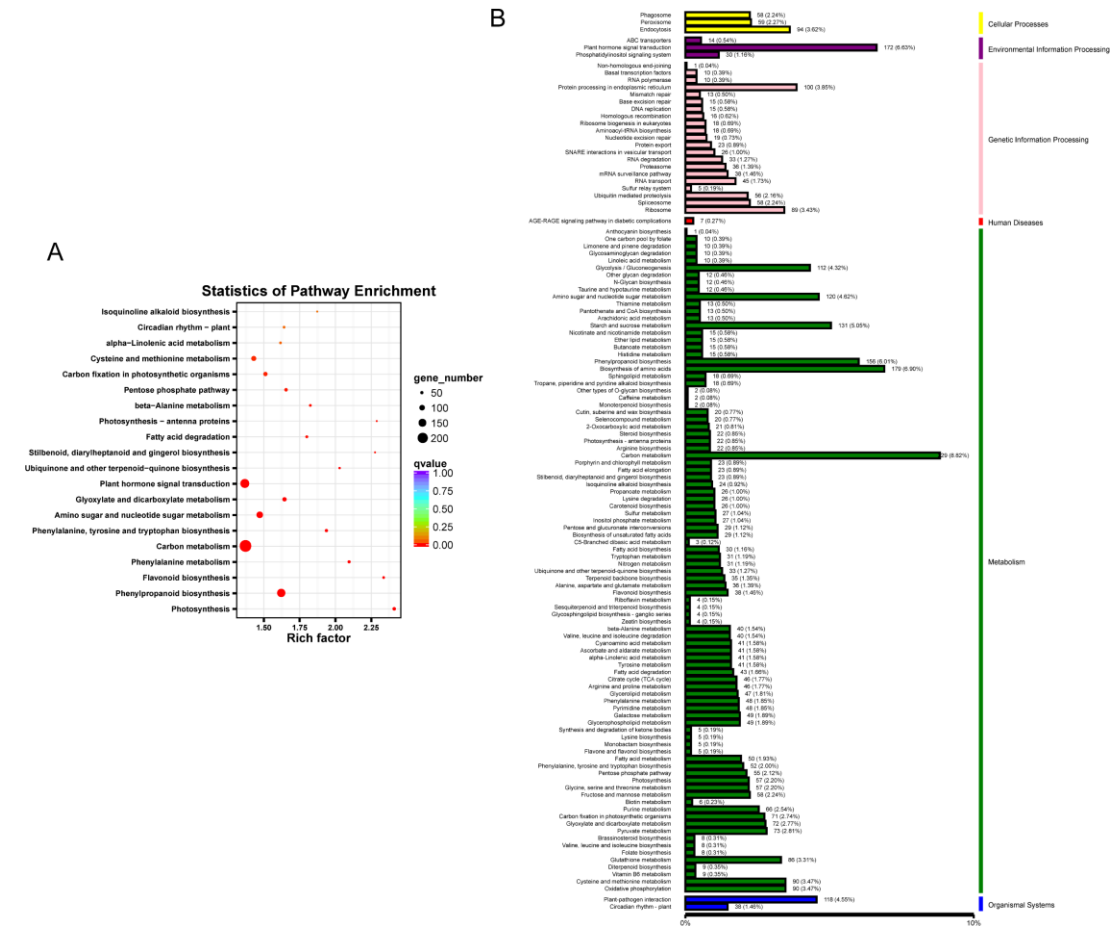

Supplement: s1 [file s1]
