# Supplementary material for: Photosynthesis, Phytohormone Signaling and Sugar Catabolism in the Culm Sheaths of Phyllostachys edulis
Source: Plants (Basel). 2022 Oct 27;11(21):2866. doi: 10.3390/plants11212866 (PMC9655093; doi:10.3390/plants11212866)
Supplement: Supplementary file 1 [file plants-11-02866-s001.zip › Table S1.xlsx]

## Sheet: Sheet1
Table S1. Real-time quantitative PCR primer.
Gene abbreviation	Gene ID	Forward	Reverse
GLGB	PH02Gene31595	GCATGGGGATGGAGTATGGG	ATCAGGTTTTGGAGGCCGAG
STS	PH02Gene10028	GCCTGATCACTACCTCGAGC	CCAGTCGTTCGAGCGTATGA
AAM	PH02Gene19768	GGTCTACATCGATGGTGCGT	ATGCCCTTGGTCGTGAAGTC
HXK	PH02Gene29892	ACAAACTCTGGAGGCATGGT	GCACCAGTCTCGCAATTTCC
GPI	PH02Gene28515	TCCGCCAAGATCAAACCTCC	TGGTGATCGATTCCAGCTGG
TPS	PH02Gene33899	ACTTTGTCTGGGTCCACGAC	AAGGTGTGGAAGCCGATGAG
TIP41	gi|242374576	AAAATCATTGTAGGCCATTGTCG	ACTAAATTAAGCCAGCGGGAGTG
