# Supplementary figures and images for: Photosynthesis, Phytohormone Signaling and Sugar Catabolism in the Culm Sheaths of Phyllostachys edulis
Source: MDPI journal article supplement (doi:10.3390/plants11212866), 2022-10-27

**Figure S6.** Heatmap of differentially expressed genes in photosynthetic signaling pathways.

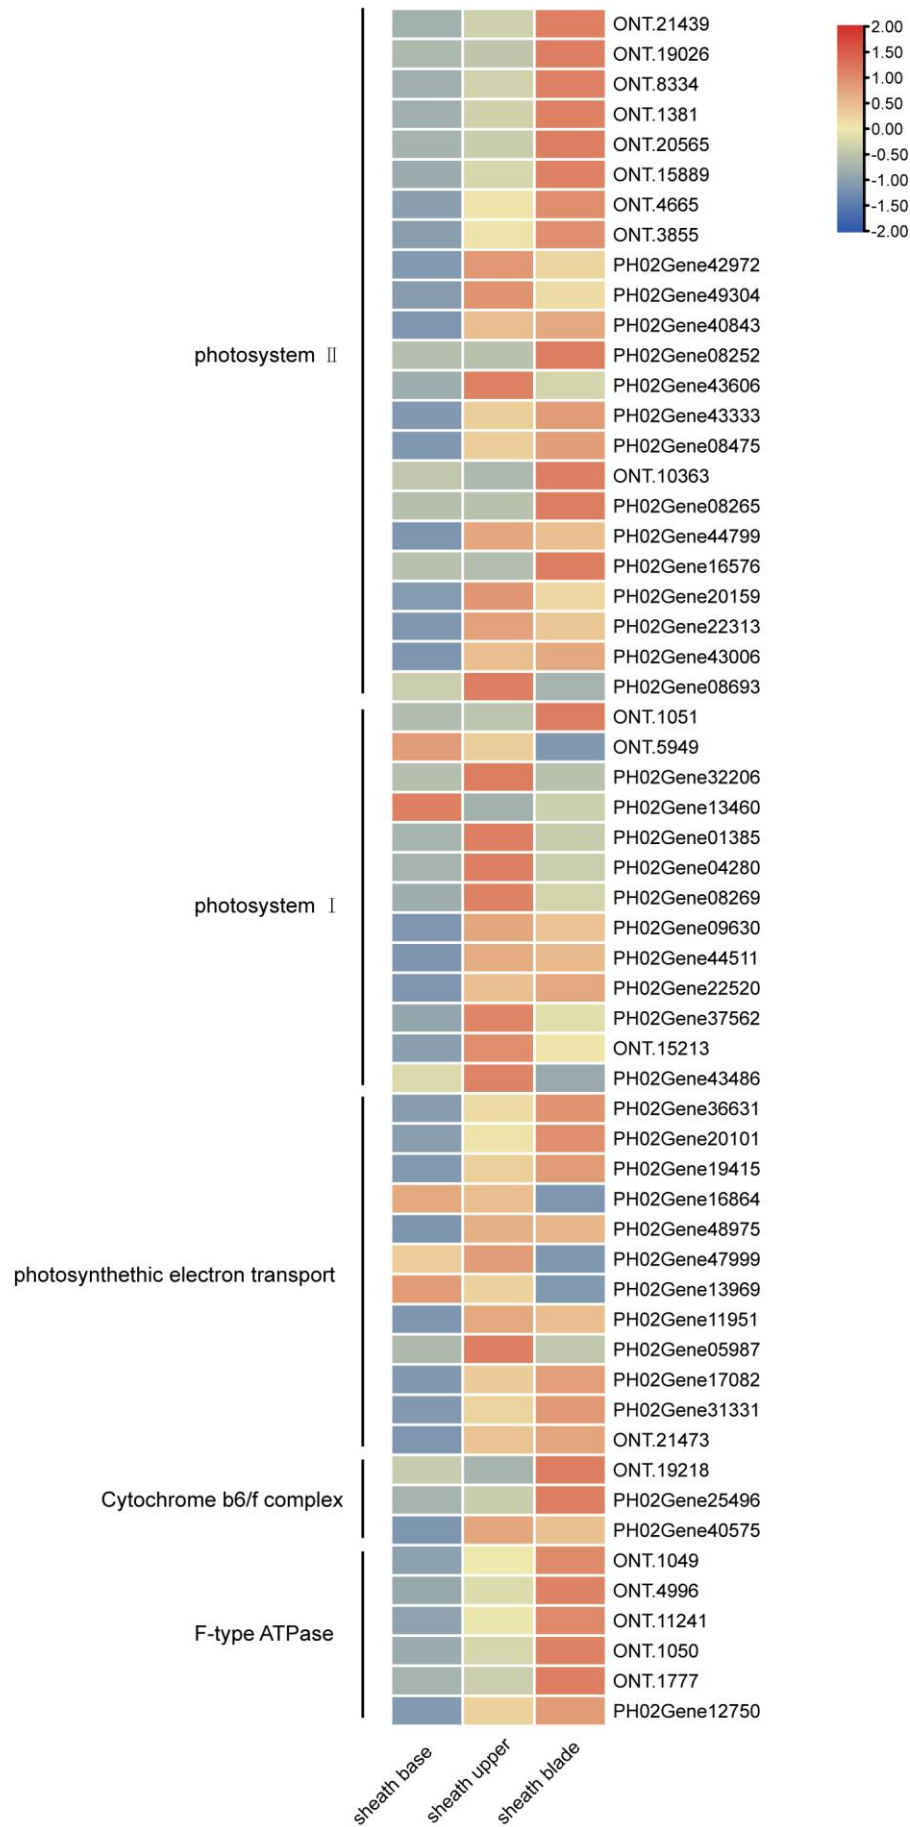

Supplement: s1 [file s1]
